# Supplementary material for: PI3K-AKT-mTOR-Signaling and beyond: the Complex Network in Gastroenteropancreatic Neuroendocrine Neoplasms
Source: PubMed Central journal article supplement — Theranostics. 2014 Jan 29;4(4):336–65. doi: 10.7150/thno.7851 (PMC3936289; doi:10.7150/thno.7851), 2014-01-29
Supplement: thnov04p0336s1.pdf [file thnov04p0336s1.pdf]

## Supplementary Material

| Substance                              | Mechanism                   | Status in other cancers                                                                                                                                                                                                                                                                                                                                                | Status in GEP-NENs                                                                                                                                                                                                                                                                                                                                                                                                                            |
|----------------------------------------|-----------------------------|------------------------------------------------------------------------------------------------------------------------------------------------------------------------------------------------------------------------------------------------------------------------------------------------------------------------------------------------------------------------|-----------------------------------------------------------------------------------------------------------------------------------------------------------------------------------------------------------------------------------------------------------------------------------------------------------------------------------------------------------------------------------------------------------------------------------------------|
| <b>Sunitinib/<br/>Sunitinib malate</b> | Inhibitor of<br>several RTK | FDA approved for kidney<br>cancer and for gastrointestinal<br>stromal tumors;<br>Multiple phase II, III and IV<br>monotherapy trials and several<br>combination under assessment                                                                                                                                                                                       | FDA approved for<br>progressive well-<br>differentiated pNENs in<br>patients with unresectable,<br>locally advanced, or<br>metastatic disease;<br>Phase IV to observe<br>efficacy and safety in<br>pNENs (NCT01525550),<br>(NCT00444795);<br>Phase II in poorly-<br>differentiated advanced<br>NENs (NCT01215578);<br>Phase II + Lantreotide in<br>NENs (NCT01731925);<br>Phase III in patients with<br>islet cell carcinoma<br>(NCT00428597) |
| <b>Ganitumab<br/>(AMG 479)</b>         | human mAb<br>against IGF-1R | Phase III in pancreatic<br>adenocarcinoma<br>(NCT01231347): has been<br>terminated;<br>Several monotherapy Phase I/II<br>studies in solid cancer entities<br>(NCT01327612),<br>(NCT00563680),<br>(NCT00719212);<br>several combination under<br>assessment                                                                                                             | Phase II in metastatic well-<br>differentiated carcinoid or<br>pNET (NCT01024387)<br>Treatment with single-<br>agent ganitumab failed to<br>result in significant tumor<br>responses [390]                                                                                                                                                                                                                                                    |
| <b>NVP-AEW541</b>                      | human mAb<br>against IGF-1R | Preclinical [391-404]                                                                                                                                                                                                                                                                                                                                                  | Preclinical [14, 135, 405]                                                                                                                                                                                                                                                                                                                                                                                                                    |
| <b>Cixutumumab<br/>(IMC-A12)</b>       | human mAb<br>against IGF-1R | Monotherapy Phase II in<br>recurrent solid cancer<br>(NCT00831844), advanced<br>sarcoma (NCT00668148),<br>Advanced liver cancer<br>(NCT00639509),<br>metastatic melanoma of the eye<br>(NCT01413191), 2 <sup>nd</sup> line<br>therapy in metastatic prostate<br>cancer and mesothelioma<br>(NCT00520481),<br>(NCT01160458);<br>several combination under<br>assessment | Phase I + Everolimus<br>in advanced NE<br>carcinomas<br>(NCT01204476)<br>Phase II in metastatic<br>NENs (NCT00781911)                                                                                                                                                                                                                                                                                                                         |
| <b>MK-0646<br/>(Dalotuzumab)</b>       | human mAb<br>against IGF-1R | Phase I in solid tumors<br>(NCT01431547),                                                                                                                                                                                                                                                                                                                              | Phase II in metastatic well-<br>differentiated NENs                                                                                                                                                                                                                                                                                                                                                                                           |

|                                                    |                                                                                           |                                                                                                                                                                                               |                                                                                              |
|----------------------------------------------------|-------------------------------------------------------------------------------------------|-----------------------------------------------------------------------------------------------------------------------------------------------------------------------------------------------|----------------------------------------------------------------------------------------------|
|                                                    |                                                                                           | (NCT00635778), (NCT00694356), CRC (NCT00925015), Breast cancer (NCT00759785) and multiple myeloma (NCT00701103); several combination under assessment                                         | (NCT00610129), failed to result in significant tumor responses in monotherapy regimens [129] |
| <b>Linsitinib (OSI-906)</b>                        | inhibitor of IGF-1R and IR                                                                | Phase III in adrenocortical carcinoma (NCT00924989); Several phase I and II trials and several combination under assessment                                                                   | N/A                                                                                          |
| <b>NVP-ADW742</b>                                  | IGF-1R inhibitor                                                                          | Preclinical [406-409]                                                                                                                                                                         | N/A                                                                                          |
| <b>BMS-536924 (HY-10262, CS-0117)</b>              | ATP-competitive IGF-1R and IR inhibitor                                                   | Preclinical [410-414]                                                                                                                                                                         | N/A                                                                                          |
| <b>BMS-754807</b>                                  | reversible inhibitor of IGF-1R/IR family kinases, inhibits IGF-1R, IR, Met, TrkA and TrkB | Phase I monotherapy in neoplasms (NCT00898716) and advanced solid cancer (NCT00569036); Phase I and II under assessment in several combinations                                               | Preclinical [21, 415, 416]                                                                   |
| <b>Gefitinib (Iressa, ZD-1839)</b>                 | EGFR inhibitor                                                                            | FDA approved for NSCLC and several Phase IV in NSCLC; Various phase II and III trials                                                                                                         | Preclinical [361, 417]                                                                       |
| <b>Afatinib (BIBW2992, Tovok)</b>                  | irreversibly inhibits EGFR/HER2                                                           | Phase III monotherapy in head and neck neoplasms (NCT01427478), (NCT01345669); in NSCLC (NCT01853826), (NCT00656136); Several phase I and II trials and several combination under assessment  | N/A                                                                                          |
| <b>Erlotinib HCl(OSI-744, CP358774, NSC718781)</b> | HER1/EGFR inhibitor                                                                       | FDA approved for NSCLC, for first-line treatment and maintenance treatment of NSCLC; approved for pancreatic cancer; Several phase II and III trials and several combination under assessment | Preclinical [241]                                                                            |
| <b>Lapatinib (GW572016)</b>                        | EGFR and ErbB2 inhibitor                                                                  | FDA approved for hormone-positive and HER2-positive advanced breast cancer and for HER2-overexpressing breast cancer;                                                                         | N/A                                                                                          |

|                                       |                                                                   |                                                                                                                                                     |                                                                                          |
|---------------------------------------|-------------------------------------------------------------------|-----------------------------------------------------------------------------------------------------------------------------------------------------|------------------------------------------------------------------------------------------|
|                                       |                                                                   | Several phase II and III trials and several combination under assessment                                                                            |                                                                                          |
| <b>AG-1478 (Tyrphostin)</b>           | EGFR inhibitor                                                    | Preclinical [418-420]                                                                                                                               | Preclinical [32]                                                                         |
| <b>CI-1033 (Canertinib, PD183805)</b> | inhibitor of EGFR and ErbB2                                       | Phase II in lung and breast neoplasms (NCT00050830), (NCT00051051)                                                                                  | N/A                                                                                      |
| <b>CUDC-101</b>                       | multi-target inhibitor targeting HDAC, EGFR and HER2              | Phase I monotherapy in several cancer entities (NCT01702285), (NCT01171924), (NCT00728793)                                                          | N/A                                                                                      |
| <b>Pelitinib (EKB-569)</b>            | EGFR inhibitor                                                    | Phase II monotherapy in NSCLC (NCT00067548) and CRC (NCT00072748)                                                                                   | N/A                                                                                      |
| <b>Icotinib (BPI-2009H)</b>           | epidermal growth factor receptor (EGFR) tyrosine kinase inhibitor | Phase IV monotherapy in NSCLC (NCT01465243), (NCT01720901), (NCT01646450); Several phase II and III trials and several combination under assessment | N/A                                                                                      |
| <b>Neratinib (HKI-272)</b>            | HER2 and EGFR inhibitor                                           | Phase III monotherapy in breast cancer (NCT00878709); Several phase I and II trials and several combination under assessment                        | N/A                                                                                      |
| <b>AZD4547</b>                        | FGFR inhibitor targeting FGFR1, FGFR2, and FGFR3                  | Phase II in patients with Patients With FGFR1 or FGFR2 Amplified Tumors (NCT01795768); Some phase I and combined studies                            | N/A                                                                                      |
| <b>Panitumumab</b>                    | EGFR mAb                                                          | FDA approved for EGFR-expressing, metastatic colorectal cancer; Several phase II and III trials and several combination under assessment            | Phase 2 in patients with metastatic carcinoid tumor and carcinoid syndrome (NCT01172717) |

**Suppl. 1:** Selected inhibitors and antibodies targeting upstream receptors of the PI3K and MAPK pathway and that are currently under preclinical and clinical assessment in GEP-NENs and other cancer entities.

| Substance                       | Mechanism                   | Status in other cancers                                     | Status in GEP-NENs                                                                        |
|---------------------------------|-----------------------------|-------------------------------------------------------------|-------------------------------------------------------------------------------------------|
| <b>Octreotide (SMS 201-995)</b> | SSTR2 and 5 peptide agonist | Phase II and III in hepatocellular carcinoma (NCT00495846), | FDA approved for metastatic carcinoid tumors and VIPomas; Multiple phase I-IV monotherapy |

|                              |                                   |                                                                                                                                                                                                                                                                                                                                                                                                                            |                                                                                                                                                                                                                                                                                                                                                                 |
|------------------------------|-----------------------------------|----------------------------------------------------------------------------------------------------------------------------------------------------------------------------------------------------------------------------------------------------------------------------------------------------------------------------------------------------------------------------------------------------------------------------|-----------------------------------------------------------------------------------------------------------------------------------------------------------------------------------------------------------------------------------------------------------------------------------------------------------------------------------------------------------------|
|                              |                                   | (NCT00386984), (NCT00241020); Phase II in liver cancer (NCT00257426); phase III in breast cancer (NCT00002967); Phase II I prostate cancer canceled due to lack of efficiency (NCT00510224); Phase II + fludarabine in non-hodgkin's lymphoma (NCT00002779); phase IV in pituitary adenoma (NCT01371643); Phase II in thyroid cancer (NCT01270321)                                                                         | studies in neuroendocrine tumore (NCT00171873), (NCT01578239); and assessment in several combinations: e.g. + everolimus (NCT00412061), (NCT00113360), (NCT01567488); + interferon alfa (NCT00569127), (NCT00569127); Phase II + Bevacizumab (NCT00569127) & Pertuzumab (NCT01121939); Phase II + 5FU (NCT00953394); Phase II + Axitinib in WDNEC (NCT01744249) |
| <b>Lanreotide (BIM23014)</b> | SSTR2 and 5 peptide agonist       | Phase II/III in hepatocellular carcinoma (NCT00495846)                                                                                                                                                                                                                                                                                                                                                                     | Phase III in carcinoid syndrome (NCT00774930), endocrine tumors (NCT00353496); and in non-functioning entero-pancreatic endocrine tumor (NCT00842348), Phase IV in neuroendocrine tumors with carcinoid symptoms (NCT00681187), several phase II trials                                                                                                         |
| <b>Pasireotide (SOM 230)</b> | SSTR1, 2, 3 and 5 peptide agonist | Phase II in thyroid cancer (NCT01270321); Phase II in hepatocellular carcinoma (NCT01639352), (NCT01488487); Phase II + everolimus in uveal melanoma (NCT01252251); Phase III in pancreatic cancer (NCT00994110); Phase II in prostate cancer (NCT01313559); Phase II in NE carcinoma of lung and thymus (NCT01563354); Phase II in non-functioning pituitary adenoma (NCT01283542), (NCT01620138); several phase I trials | Phase II and III in patients with metastatic carcinoid disease (NCT00690430), (NCT00088595); Phase I + everolimus in NENs (NCT00804336), (NCT01263353); Phase II + everolimus in islet cell carcinoma (NCT01374451)                                                                                                                                             |
| <b>Vapreotide (RC160)</b>    | SSTR2 and 5 peptide agonist       | Phase III in pancreatic cancer canceled due to lack of response (NCT00014651)                                                                                                                                                                                                                                                                                                                                              | Phase III in in neuroendocrine gastro-intestinal tumors [421]                                                                                                                                                                                                                                                                                                   |
| <b>Seglitide (MK-678)</b>    | SSTR2 and 5 peptide agonist       | N/A                                                                                                                                                                                                                                                                                                                                                                                                                        | N/A                                                                                                                                                                                                                                                                                                                                                             |

|                   |                                   |                                   |                                                                                            |
|-------------------|-----------------------------------|-----------------------------------|--------------------------------------------------------------------------------------------|
| <b>L362,855</b>   | SSTR2, 3 and 5 peptide agonist    | N/A                               | N/A                                                                                        |
| <b>BIM 23268</b>  | SSTR5 peptide agonist             | Preclinical [90, 120, 422-424]    | N/A                                                                                        |
| <b>BIM 23197</b>  | SSTR2 and 5 peptide agonist       | Preclinical [120, 422, 423, 425]  | N/A                                                                                        |
| <b>BIM 23926</b>  | SSTR1 peptide agonist             | Preclinical [426-429]             | Preclinical [430]                                                                          |
| <b>BIM 23120</b>  | SSTR2 peptide agonist             | Preclinical [425, 428-433]        | Preclinical [430]                                                                          |
| <b>BIM 23206</b>  | SSTR5 peptide agonist             | Preclinical [425, 427-433]        | Preclinical [430]                                                                          |
| <b>BIM 23745</b>  | SSTR1 peptide agonist             | Preclinical [426, 431, 432, 434]  | N/A                                                                                        |
| <b>NC8-12</b>     | SSTR2 and 3 peptide agonist       | Preclinical [435]                 | N/A                                                                                        |
| <b>BIM-23A779</b> | SSTR1, 2, 3 and 5 peptide agonist | Preclinical [120, 424]            | N/A                                                                                        |
| <b>BIM23052</b>   | SSTR2, 3 and 5 peptide agonist    | Preclinical [436]                 | N/A                                                                                        |
| <b>KE108</b>      | SSTR1-5 peptide agonist           | Preclinical [90, 437, 438]        | N/A                                                                                        |
| <b>L-054,264</b>  | SSTR2 non-peptide agonist         | N/A                               | N/A                                                                                        |
| <b>L-054,522</b>  | SSTR2 non-peptide agonist         | Preclinical [54, 439, 440]        | N/A                                                                                        |
| <b>L-779,976</b>  | SSTR2 non-peptide agonist         | Preclinical [441]                 | N/A                                                                                        |
| <b>L-817,818</b>  | SSTR5 non-peptide agonist         | Preclinical [90, 438, 441]        | N/A                                                                                        |
| <b>BIM-23A758</b> | SSTR2/D2R agonist                 | Preclinical: [121]                | Preclinical: [122]                                                                         |
| <b>BIM-23A760</b> | SSTR2/D2R agonist                 | Preclinical: [120, 433, 442, 443] | Preclinical: [122]<br>Phase II study in carcinoid syndrome has been terminated due to poor |

|                   |                          |                                      |                                             |
|-------------------|--------------------------|--------------------------------------|---------------------------------------------|
|                   |                          |                                      | inhibition of GH and IGF-1<br>(NCT01018953) |
| <b>BIM-23A387</b> | SSTR2/<br>D2R<br>agonist | Preclinical: [121, 428, 444-<br>447] | N/A                                         |
| <b>BIM-23A761</b> | SSTR2/<br>D2R<br>agonist | Preclinical: [121, 433, 448]         | N/A                                         |

**Suppl. 2** Selected non-radiolabeled SSTR agonist under current clinical and preclinical assessment in GEP-NENs and other cancer entities.

| Substance                   | Mechanism                                                                                            | Status in other cancers                                                                                                                                                            | Status in GEP-NENs                                 |
|-----------------------------|------------------------------------------------------------------------------------------------------|------------------------------------------------------------------------------------------------------------------------------------------------------------------------------------|----------------------------------------------------|
| <b>NVP-BEZ235</b>           | ATP-competitive inhibitor of class I PI3Ks and mTORC1 and C2                                         | Monotherapy:<br>Phase I/II<br>In PEComa and RCC<br>(NCT01690871) (NCT01453595);<br>Phase II/III<br>in transitional cell carcinoma<br>(NCT01856101);<br>And in several combinations | Phase II in pNENs<br>(NCT01628913,<br>NCT01658436) |
| <b>LY294002</b>             | Inhibitor of p110 $\alpha$ , p110 $\delta$ and p110 $\beta$ , and blocks autophagosome formation     | Preclinical [449-457]                                                                                                                                                              | Preclinical [131, 132]                             |
| <b>XL765/<br/>SAR254409</b> | dual inhibitor of mTOR/PI3k for mTOR, p110 $\alpha$ , p110 $\beta$ , p110 $\gamma$ and p110 $\delta$ | Phase I in solid cancer<br>(NCT00485719) and recurrent glioblastoma (NCT01240460);<br>Combined therapy (NCT00704080),<br>(NCT00777699), (NCT01082068)                              | N/A                                                |
| <b>Wortmannin</b>           | PI3K, mTOR, DNA-PK, MAPK                                                                             | Preclinical [458-463]                                                                                                                                                              | N/A                                                |
| <b>GDC-0980/<br/>RG7422</b> | inhibitor of PI3K $\alpha$ , PI3K $\beta$ , PI3K $\delta$ and PI3K $\gamma$ and mTOR                 | Phase II in endometrial carcinoma<br>(NCT01455493), and RCC<br>(NCT01442090);<br>Phase I in Non-Hodgkin's lymphoma, solid cancers (NCT00854126);<br>combined therapy               | N/A                                                |
| <b>PI-103</b>               | ATP-competitive PI3K inhibitor of DNA-PK, p110 $\alpha$ , mTORC1, PI3KC2 $\beta$ ,                   | Preclinical [464-469]                                                                                                                                                              | N/A                                                |

|                                 |                                                                                                                          |                                                                                                                                                                                                                                                                                                                                                           |     |
|---------------------------------|--------------------------------------------------------------------------------------------------------------------------|-----------------------------------------------------------------------------------------------------------------------------------------------------------------------------------------------------------------------------------------------------------------------------------------------------------------------------------------------------------|-----|
|                                 | p110 $\delta$ ,<br>mTORC2,<br>p110 $\beta$ , and<br>p110 $\gamma$                                                        |                                                                                                                                                                                                                                                                                                                                                           |     |
| <b>GSK1059615</b>               | dual inhibitor of PI3K $\alpha$ , PI3K $\beta$ , PI3K $\delta$ , PI3K $\gamma$ and mTOR, DNA-PK                          | Phase I in solid tumors and lymphoma (NCT00695448), Terminated due to lack of sufficient exposure                                                                                                                                                                                                                                                         | N/A |
| <b>PKI-587/<br/>PF-05212384</b> | dual inhibitor of PI3K $\alpha$ , PI3K $\gamma$ and mTOR                                                                 | Phase I in neoplasms (NCT00940498) and Phase II in endometrial neoplasms (NCT01420081) and combined therapy (NCT01347866)                                                                                                                                                                                                                                 | N/A |
| <b>PF-04691502</b>              | ATP-competitive, selective inhibitor of PI3K( $\alpha/\beta/\delta/\gamma$ ), mTOR, and Akt phosphorylation on T308/S473 | Phase I Monotherapy (NCT00927823) and II in combined approaches (NCT01658176), (NCT01430585)                                                                                                                                                                                                                                                              | N/A |
| <b>(NVP)-BKM120</b>             | PI3K inhibitor of p110 $\alpha$ , p110 $\beta$ , p110 $\delta$ and p110 $\gamma$                                         | Multiple Phase II monotherapy studies, e.g. in locally advanced cervical cancer (NCT01613677), endometrial cancer (NCT01550380), thyroid cancer (NCT01830504), prostate cancer (NCT01385293), (NCT01695473), glioblastoma (NCT01339052), triple negative breast cancer (NCT01629615), CRC (NCT01591421); Several Phase I and multiple combined approaches | N/A |
| <b>SF1126</b>                   | pan-PI3K inhibitor                                                                                                       | Phase I in solid tumors (NCT00907205)                                                                                                                                                                                                                                                                                                                     | N/A |
| <b>PX-866</b>                   | PI3K( $\alpha/\delta/\gamma$ )                                                                                           | Phase I in advanced solid tumors (NCT00726583); Phase II in prostate cancer (NCT01331083) and glioblastoma (NCT01259869); Several combinations under phase I and II assessment                                                                                                                                                                            | N/A |
| <b>XL-147/<br/>SAR245408</b>    | reversible class I PI3K inhibitor for wild type and mutant p110 $\alpha$                                                 | Phase II in endometrial cancer (NCT01013324), Phase I in glioblastoma (NCT01240460), solid tumors or lymphoma (NCT00486135); Several combinations under phase I and II assessment                                                                                                                                                                         | N/A |
| <b>ZSTK474</b>                  | pan-class I PI3K inhibitor                                                                                               | Phase I/II in neoplasms (NCT01682473), (NCT01280487)                                                                                                                                                                                                                                                                                                      | N/A |
| <b>GSK615 /</b>                 | dual inhibitor of                                                                                                        | Phase I in solid tumors or lymphomas                                                                                                                                                                                                                                                                                                                      | N/A |

|                                              |                                                                                    |                                                                                                                                                                                                 |     |
|----------------------------------------------|------------------------------------------------------------------------------------|-------------------------------------------------------------------------------------------------------------------------------------------------------------------------------------------------|-----|
| <b>GSK1059615</b>                            | PI3K $\alpha$ , PI3K $\beta$ , PI3K $\delta$ , PI3K $\gamma$ and mTOR              | (NCT00695448)                                                                                                                                                                                   |     |
| <b>CH5132799</b>                             | inhibitor of PI3K $\alpha$                                                         | Phase I in solid tumors (NCT01222546)                                                                                                                                                           | N/A |
| <b>GDC-0941</b>                              | inhibitor of PI3K $\alpha$ , PI3K $\beta$ , PI3K $\delta$ and PI3K $\gamma$ , Flt3 | Phase I as 2 <sup>nd</sup> line therapy in solid tumors (NCT00876109) and Non-Hodgkin's lymphoma (NCT00876122);<br>Several combinations under phase I and II assessment                         | N/A |
| <b>BAY80-6946</b>                            | reversible PI3K inhibitor for PI3K $\alpha$ and PI3K $\beta$                       | Phase I in advanced cancer (NCT00962611) and lymphoma (NCT01660451);<br>Some combinations under phase I assessment                                                                              | N/A |
| <b>CAL-101/<br/>GS-1101<br/>(Idelalisib)</b> | PI3K class I inhibitor of p110 $\delta$                                            | In Phase I,II and III assessment as monotherapy and combined regimen in multiple hematologic neoplasms (NCT01306643), (NCT01539291), (NCT01644799), (NCT01569295), (NCT01796470), (NCT01539512) | N/A |
| <b>BYL719</b>                                | Inhibitor of PI3K (p110 $\alpha$ )                                                 | Phase I in Monotherapy of solid tumors (NCT01387321);<br>Some combinations under phase I and II assessment                                                                                      | N/A |
| <b>MLN1117/<br/>INK1117</b>                  | Inhibitor of PI3K (p110 $\alpha$ )                                                 | Phase I in metastatic solid tumors (NCT01449370)                                                                                                                                                | N/A |
| <b>GSK2636771</b>                            | Inhibitor of PI3K (p110 $\beta$ )                                                  | Phase I in PTEN-deficient solid tumors (NCT01458067)                                                                                                                                            | N/A |
| <b>TGX-221</b>                               | Inhibitor of PI3K (p110 $\beta$ )                                                  | Preclinical [470]                                                                                                                                                                               | N/A |

**Suppl. 3:** PI3 kinase targeting biotherapy under current clinical and preclinical investigation

| Substance                                                          | Mechanism                                                  | Status in other cancers                                                                                                                                                                | Status in GEP-NENs |
|--------------------------------------------------------------------|------------------------------------------------------------|----------------------------------------------------------------------------------------------------------------------------------------------------------------------------------------|--------------------|
| <b>Perifosine (KRX-0401)</b>                                       | Targets the PH domain of Akt1/2/3, MEK 1/2, ERK1/2, JNK    | Phase III in multiple myeloma (NCT01002248), and + Capecitabine in CRC (NCT01097018);<br>Several Phase I and II studies in solid and hematologic cancers; multiple combined approaches | Preclinical [196]  |
| <b>Triciribine and VD-0002 (Triciribine-phosphate, API-2, NSC-</b> | Targets the PH domain of Akt1/2/3, DNA synthesis inhibitor | Phase I in leukemia (NCT00642031), metastatic cancer (NCT00363454);<br>Phase I/II in combination with chemotherapy in breast cancer (NCT01697293) and ovarian cancer (NCT01690468)     | Preclinical [169]  |



|                               |                                        |                                                                                                                                                                                                                                                                                                                                                                                                                                                                                  |                                                              |
|-------------------------------|----------------------------------------|----------------------------------------------------------------------------------------------------------------------------------------------------------------------------------------------------------------------------------------------------------------------------------------------------------------------------------------------------------------------------------------------------------------------------------------------------------------------------------|--------------------------------------------------------------|
| <b>280594)</b>                |                                        |                                                                                                                                                                                                                                                                                                                                                                                                                                                                                  |                                                              |
| <b>PHT-427</b>                | dual inhibitor of Akt and PDK1         | Preclinical [471]                                                                                                                                                                                                                                                                                                                                                                                                                                                                | N/A                                                          |
| <b>GDC-0068</b>               | Akt 1, 2, 3                            | Phase I in solid tumors (NCT01090960) and in Phase I/II in combined approaches                                                                                                                                                                                                                                                                                                                                                                                                   | N/A                                                          |
| <b>SR13668</b>                | Akt inhibitor                          | Phase 0/I chemoprevention study in healthy patients [472] (NCT00896207)                                                                                                                                                                                                                                                                                                                                                                                                          | N/A                                                          |
| <b>GSK690693</b>              | Inhibitor of Akt 1, 2, 3               | Phase I in solid cancer (NCT00493818) and relapsed lymphoma (NCT00666081), both studies cancelled                                                                                                                                                                                                                                                                                                                                                                                | N/A                                                          |
| <b>KP372-1</b>                | Inhibitor of Akt, PDK-1, Flt3          | Preclinical [473-475]                                                                                                                                                                                                                                                                                                                                                                                                                                                            | N/A                                                          |
| <b>A-443654</b>               | Inhibitor of Akt                       | Preclinical [476-479]                                                                                                                                                                                                                                                                                                                                                                                                                                                            | N/A                                                          |
| <b>XL-418</b>                 | Inhibitor of Akt / p70S6K              | Phase I in solid tumors (NCT00460278), suspended due to low drug exposure                                                                                                                                                                                                                                                                                                                                                                                                        | N/A                                                          |
| <b>MK-2206</b>                | Allosteric inhibitor of Akt 1, 2, 3    | Phase II monotherapy in ovarian cancer (NCT01283035), in esophageal and gastric cancer (NCT01260701); DLBCL (NCT01466868), (NCT01481129); CRC (NCT01333475), (NCT01802320); AML (NCT01253447); endometrial cancer (NCT01307631), (NCT01312753); liver and biliary cancer (NCT01239355), (NCT01425879); head and neck cancer (NCT01349933), (NCT01370070); breast cancer (NCT01277757); kidney cancer (NCT01239342); various lymphomas (NCT01258998); Several combined approaches | preclinical [480], Phase II in metastatic NENs (NCT01169649) |
| <b>UCN-01</b>                 | Inhibitor of PDK-1, Chk1, PKC isoforms | Phase II monotherapy in T-cell lymphoma (NCT00082017), metastatic melanoma (NCT00072189), several phase I and combination studies                                                                                                                                                                                                                                                                                                                                                | N/A                                                          |
| <b>BX-320, BX-795, BX-912</b> | Small molecule PDK-1 inhibitors        | Preclinical [481]                                                                                                                                                                                                                                                                                                                                                                                                                                                                | N/A                                                          |

**Suppl. 4:** Akt and PDK-1 inhibitors under clinical and preclinical assessment in GEP-NENs and other cancer entities.

| Substance                  | Mechanism                      | Status in other cancers                                                                     | Status in GEP-NENs                         |
|----------------------------|--------------------------------|---------------------------------------------------------------------------------------------|--------------------------------------------|
| <b>Everolimus (RAD001)</b> | Allosteric inhibitor of mTORC1 | FDA approved for subependymal giant cell astrocytoma (SEGA); for advanced hormone receptor- | Phase III—approved for pNENs (NCT00510068) |

|                               |                                                                              |                                                                                                                                                                                                                          |                                                                                                                                                                                                     |
|-------------------------------|------------------------------------------------------------------------------|--------------------------------------------------------------------------------------------------------------------------------------------------------------------------------------------------------------------------|-----------------------------------------------------------------------------------------------------------------------------------------------------------------------------------------------------|
|                               |                                                                              | positive, HER2-negative breast cancer in combination with Exemestane, for advanced RCC after failure of treatment with Sunitinib or Sorafenib;<br>Several phase III and IV studies with and without combinations ongoing | [244];<br>Under clinical phase I and II assessment in several combinations (NCT00942682, NCT00576680, NCT01263353, NCT01204476, NCT00843531, NCT01229943);<br>Preclinical assessment in PDNEC [242] |
| <b>Temsirolimus (CCI-779)</b> | Allosteric inhibitor of mTORC1                                               | FDA approved for advanced RCC;<br>Several phase III and IV studies with and without combinations ongoing                                                                                                                 | Phase II in advanced NE carcinomas (NCT00093782)[482]                                                                                                                                               |
| <b>CC-223</b>                 | ATP-competitive inhibitor of mTORC1/ mTORC2                                  | Phase I/II monotherapy for patients with advanced solid tumors, Non-Hodgkin lymphoma or multiple myeloma (NCT01177397)                                                                                                   | N/A                                                                                                                                                                                                 |
| <b>NVP-BEZ235</b>             | ATP-competitive inhibitor of class I PI3Ks and both mTORC1 and C2 and DNA-PK | Monotherapy:<br>Phase I/II<br>In PEComa and RCC (NCT01690871), (NCT01453595);<br>Phase II/III<br>in transitional cell carcinoma (NCT01856101);<br>And in several combinations                                            | Phase II in pNENs (NCT01628913, NCT01658436)                                                                                                                                                        |
| <b>LY2584702</b>              | Inhibitor of p70S6K                                                          | Phase I in solid tumors (NCT01241461)                                                                                                                                                                                    | N/A                                                                                                                                                                                                 |
| <b>AZD-8055</b>               | Inhibitor of mTORC1/ mTORC2                                                  | Phase I in solid tumors (NCT00731263), (NCT00973076);<br>liver cancer (NCT00999882); and gliomas (NCT01316809)                                                                                                           | N/A                                                                                                                                                                                                 |
| <b>OSI-027</b>                | Inhibitor of mTORC1/ mTORC2                                                  | Phase I in solid tumors and lymphoma (NCT00698243)                                                                                                                                                                       | N/A                                                                                                                                                                                                 |
| <b>INK-128/ MLN0128</b>       | Inhibitor of mTORC1/ mTORC2                                                  | Phase I monotherapy in solid tumors (NCT01058707) and myelomas (NCT01118689)                                                                                                                                             | N/A                                                                                                                                                                                                 |

**Suppl. 5:** mTOR und p70S6K inhibitors under clinical and preclinical investigation in GEP-NENs and other cancer entities.

| Substance                                       | Mechanism                      | Status in other cancers                                                                                               | Status in GEP-NENs |
|-------------------------------------------------|--------------------------------|-----------------------------------------------------------------------------------------------------------------------|--------------------|
| <b>Vemurafenib (PLX4032, RG7204, RO5185426)</b> | inhibitor of mutant B-RafV600E | FDA and EMA approved for unresectable or metastatic melanoma with the BRAFV600E mutation (NCT01006980) (NCT01667419), | N/A                |

|                                                   |                                                                                       |                                                                                                                                                                                                               |                                                                                                                                        |
|---------------------------------------------------|---------------------------------------------------------------------------------------|---------------------------------------------------------------------------------------------------------------------------------------------------------------------------------------------------------------|----------------------------------------------------------------------------------------------------------------------------------------|
|                                                   |                                                                                       | Several Phase I, II and III, several combined approaches                                                                                                                                                      |                                                                                                                                        |
| <b>PLX-4720</b>                                   | inhibitor of mutant B-RafV600E and C-Raf-1Y340D/Y341D                                 | Preclinical [325, 483-488]                                                                                                                                                                                    | N/A                                                                                                                                    |
| <b>Dabrafenib (GSK2118436)</b>                    | ATP-competitive inhibitor of B-Raf, mutant B-RafV600E and C-Raf                       | FDA approved for unresectable or metastatic melanoma with BRAF V600E mutation (NCT01584648), Several Phase I and II, Several combined approaches [489-491]                                                    | N/A                                                                                                                                    |
| <b>MLN2480</b>                                    | pan-Raf inhibitor                                                                     | Phase I in solid tumors (NCT01425008)                                                                                                                                                                         | N/A                                                                                                                                    |
| <b>PF-04880594</b>                                | inhibitor for B-Raf and C-Raf                                                         | Preclinical [492, 493]                                                                                                                                                                                        | N/A                                                                                                                                    |
| <b>Regorafenib (BAY73-4506, Fluoro-Sorafenib)</b> | multi-target inhibitor for VEGFR1, VEGFR2, VEGFR3, PDGFR $\beta$ , Kit, RET and C-Raf | FDA approved for 2 <sup>nd</sup> line therapy in Metastatic CRC (NCT01103323) and 2 <sup>nd</sup> and 3 <sup>rd</sup> line therapy of GIST (NCT01646593), Several Phase I and II, Several combined approaches | N/A                                                                                                                                    |
| <b>AZ628</b>                                      | wild-type C-Raf and mutant BRAFV600E                                                  | Preclinical [494, 495]                                                                                                                                                                                        |                                                                                                                                        |
| <b>PD98059</b>                                    | non-ATP competitive MEK inhibitor                                                     | Preclinical [496-501]                                                                                                                                                                                         | Preclinical [132, 312]                                                                                                                 |
| <b>U-0126 (U0126-EtOH)</b>                        | inhibitor of MEK1 and MEK2                                                            | Preclinical [502-515]                                                                                                                                                                                         | Preclinical [274, 312, 385, 516, 517]                                                                                                  |
| <b>BAY43-9006 (Sorafenib)</b>                     | multikinase inhibitor of C-Raf, B-Raf and VEGFR-2                                     | FDA Approved for advanced renal cell carcinoma and hepatocellular carcinoma                                                                                                                                   | Phase II in Progressive Metastatic Neuroendocrine Tumors (NCT00131911); and in NEN + Cyclophosphamide (NCT00605566); Preclinical [309] |
| <b>Raf265</b>                                     | B-Raf and VEGFR2                                                                      | Phase II in metastatic carcinoma (NCT00304525),                                                                                                                                                               | Preclinical [135, 310, 311]                                                                                                            |

|                                                   |                                        |                                                                                                                                                                                                                                                                                                                                                                                 |                        |
|---------------------------------------------------|----------------------------------------|---------------------------------------------------------------------------------------------------------------------------------------------------------------------------------------------------------------------------------------------------------------------------------------------------------------------------------------------------------------------------------|------------------------|
|                                                   | inhibitor                              | Phase I + MEK162 in solid tumors with BRAFV600E Mutations (NCT01352273)                                                                                                                                                                                                                                                                                                         |                        |
| <b>Teriflunomide (TFN)</b>                        | Tyrosine kinase inhibitor              | Preclinical [518, 519]                                                                                                                                                                                                                                                                                                                                                          | Preclinical [318]      |
| <b>Leflunomide (LFN)</b>                          | Tyrosine kinase inhibitor,             | Phase II<br>In brain and central Nervous System Tumors (NCT00003775),<br>Phase II and III in combination in Stage IV Prostate Cancer (NCT00004071)                                                                                                                                                                                                                              | Preclinical [318]      |
| <b>Tautomycin (TTY)</b>                           | serine/threonine phosphatase inhibitor | Preclinical [520-522]                                                                                                                                                                                                                                                                                                                                                           | Preclinical [319]      |
| <b>ZM336372</b>                                   | C-Raf inhibitor                        | Preclinical [523]                                                                                                                                                                                                                                                                                                                                                               | Preclinical [321, 517] |
| <b>AZD6244 (Selumetinib, ARRY 142886)</b>         | MEK1 inhibitor                         | Phase II as monotherapy and in several combined approaches in BRAF mutated solid tumors (NCT00888134), NSCLC (NCT01229150), (NCT01750281), (NCT00890825), (NCT00372788); in differentiated thyroid cancer (NCT01843062); Pancreatic cancer (NCT00372944), CRC (NCT01333475), (NCT00514761); Further phase II studies in liver cancer, multiple myeloma, melanoma, breast cancer | N/A                    |
| <b>PD0325901</b>                                  | ATP-competitive MEK inhibitor          | Phase I + PI3K pathway inhibitors in advanced cancer (NCT01347866); Both, Phase II in NSCLC (NCT00174369) and Phase I/II in breast cancer, colon cancer and melanoma (NCT00147550) have been prematurely terminated due to safety concerns                                                                                                                                      | N/A                    |
| <b>GSK1120212 (Trametinib, GSK212, JTP-74057)</b> | MEK1 and MEK2 inhibitor                | Phase III in BRAF V600E/K Mutation-positive Melanoma (NCT01245062), (NCT01597908), (NCT01584648), (NCT01682083)                                                                                                                                                                                                                                                                 | N/A                    |
| <b>CI-1040 (PD184352)</b>                         | ATP non-competitive MEK1/2 inhibitor   | Phase II in NSCLC, Breast, Colon and Pancreatic Cancer (NCT00034827), (NCT00033384)                                                                                                                                                                                                                                                                                             | N/A                    |
| <b>BIX 02189</b>                                  | MEK5 inhibitor                         | Preclinical [524]                                                                                                                                                                                                                                                                                                                                                               | N/A                    |
| <b>AS703026 (Pimasertib,</b>                      | non-competitive inhibitor of           | Phase II in N-Ras mutated melanoma (NCT01693068);                                                                                                                                                                                                                                                                                                                               | N/A                    |

|                                                    |                                   |                                                                                                                                                                                          |     |
|----------------------------------------------------|-----------------------------------|------------------------------------------------------------------------------------------------------------------------------------------------------------------------------------------|-----|
| <b>MSC1936369B)</b>                                | MEK1/2                            | Phase I in solid tumors (NCT01668017), (NCT00982865), (NCT01390818); Hematological malignancies (NCT00957580); Some combined therapy studies                                             |     |
| <b>TAK-733</b>                                     | non ATP-competitive MEK inhibitor | Phase I in advanced non-hematologic malignancies (NCT00948467)                                                                                                                           | N/A |
| <b>BIX 02188</b>                                   | MEK5 inhibitor                    | Preclinical [524-526]                                                                                                                                                                    | N/A |
| <b>GDC-0973/<br/>XL518</b>                         | MEK inhibitor                     | Phase 3 + vemurafenib in patients with malignant melanoma (NCT01689519); Several phase I combinatory studies in solid cancers (NCT00467779), (NCT01562275), (NCT00996892), (NCT01506973) | N/A |
| <b>MEK162</b>                                      | MEK inhibitor                     | Phase II in metastatic carcinoma (NCT00304525), Phase I + Raf265 in solid tumors with BRAFV600E Mutations (NCT01352273)                                                                  | N/A |
| <b>Pazopanib</b>                                   | VEGFR/PDGR/ Raf Inhibitor         | FDA approved for advanced soft tissue sarcoma and advanced renal cell carcinoma; Several phase III and IV studies                                                                        | N/A |
| <b>BMS-908662/<br/>XL281</b>                       | RAF Inhibitor                     | Phase I + Ipilimumab in patients with melanoma (NCT01245556); Phase I/II in CRC (NCT01086267)                                                                                            | N/A |
| <b>Refametinib,<br/>(RDEA119,<br/>BAY 86-9766)</b> | MEK inhibitor, MAPK inhibitor     | Phase I monotherapy in neoplasms (NCT01179295) and in patients with advanced cancer [527]<br>Phase I and II in several combinations                                                      |     |

**Suppl. 6:** Inhibitors and activators of Raf and MEK under preclinical and clinical assessment in GEP-NENs and other cancer entities.

| Substance                         | Mechanism                                                 | Status in other cancers                   | Status in GEP-NENs |
|-----------------------------------|-----------------------------------------------------------|-------------------------------------------|--------------------|
| <b>SCH772984</b>                  | inhibitor of ERK1/2                                       | Preclinical [528]                         | N/A                |
| <b>SB 203580</b>                  | p38 MAPK inhibitor and inhibitor of Akt phosphorylation   | Preclinical [529, 530]                    | Preclinical [132]  |
| <b>BIRB 796<br/>(Doramapimod)</b> | selective p38 $\alpha$ MAPK inhibitor                     | Preclinical [531, 532]                    | N/A                |
| <b>SB 202190</b>                  | p38 MAPK inhibitor targeting p38 $\alpha$ and p38 $\beta$ | Preclinical [533, 534]                    | N/A                |
| <b>LY2228820</b>                  | inhibitor of p38 MAPK                                     | Phase I in advanced cancer (NCT01393990); | N/A                |

|                               |                                                           | Phase I/II in ovarian cancer<br>(NCT01663857)                                           |                   |
|-------------------------------|-----------------------------------------------------------|-----------------------------------------------------------------------------------------|-------------------|
| <b>VX-745</b>                 | inhibitor of p38 $\alpha$ MAPK and p38 $\beta$ MAPK       | Preclinical [535]                                                                       | N/A               |
| <b>SP600125 (EI-305)</b>      | inhibitor for JNK1, JNK2 and JNK3                         | Preclinical [536-544]                                                                   | N/A               |
| <b>JNK-IN-8</b>               | irreversible JNK inhibitor for JNK1, JNK2, JNK3 and JNK4  | Preclinical [545]                                                                       | N/A               |
| <b>LY3007113</b>              | inhibitor of p38 MAPK                                     | Phase I in advanced cancer (NCT01463631),                                               | N/A               |
| <b>BVD-523</b>                | ERK1/2 inhibitor                                          | Phase I/II in solid tumors (NCT01781429)                                                | N/A               |
| <b>SCH772984</b>              | inhibitor of ERK1/2                                       | Preclinical [528]                                                                       | N/A               |
| <b>SB 203580</b>              | p38 MAPK inhibitor and inhibitor of Akt phosphorylation   | Preclinical [529, 530]                                                                  | Preclinical [132] |
| <b>BIRB 796 (Doramapimod)</b> | selective p38 $\alpha$ MAPK inhibitor                     | Preclinical [531, 532]                                                                  | N/A               |
| <b>SB 202190</b>              | p38 MAPK inhibitor targeting p38 $\alpha$ and p38 $\beta$ | Preclinical [533, 534]                                                                  | N/A               |
| <b>LY2228820</b>              | inhibitor of p38 MAPK                                     | Phase I in advanced cancer (NCT01393990);<br>Phase I/II in ovarian cancer (NCT01663857) | N/A               |
| <b>VX-745</b>                 | inhibitor of p38 $\alpha$ MAPK and p38 $\beta$ MAPK       | Preclinical [535]                                                                       | N/A               |
| <b>SP600125 (EI-305)</b>      | inhibitor for JNK1, JNK2 and JNK3                         | Preclinical [536-544]                                                                   | N/A               |
| <b>JNK-IN-8</b>               | irreversible JNK inhibitor for JNK1, JNK2, JNK3 and JNK4  | Preclinical [545]                                                                       | N/A               |
| <b>LY3007113</b>              | inhibitor of p38 MAPK                                     | Phase I in advanced cancer (NCT01463631),                                               | N/A               |
| <b>BVD-523</b>                | ERK1/2 inhibitor                                          | Phase I/II in solid tumors (NCT01781429)                                                | N/A               |

**Suppl. 7:** Selected MAPK inhibitors under clinical and preclinical investigation in GEP-NENs and other cancer entities.
